# Supplementary material
Source: publisher figshare collection journal article supplement (https://tandf.figshare.com/ndownloader/files/22447871)
Supplement: Supplementary file 1 [file 22447871]

**Supplemental Table. Differences in adipose tissue protein abundance in carbohydrate disorder status.**

| **Name** |  | **ID Swissprot** | **Species** | **Adipose tissue sample** | **Carbohydrate disorder** | **Author (Year)** |
| --- | --- | --- | --- | --- | --- | --- |
|  |  |  |  |  |  |  |
| **1. Energy and metabolism** |  |  |  |  |  |  |
| 3-hydroxymethyl-3-methylglutaryl-CoA lyase | ↓ | P35914 | Human | VAT | Type 2 diabetes | Kim *et al.* 2014 [39] |
| Adenylate kinase 3 | ↓ | Q9UIJ7 | Human | VAT | Type 2 diabetes | Kim *et al.* 2014 [39] |
| Albumin | ↓ | P02768 | Human | VAT | Type 2 diabetes | Kim *et al.* 2014 [39] |
| Angiogenin | ↓ | P03950 | Human | VAT | Type 2 diabetes | Kim *et al.* 2014 [39] |
| Annexin A8-like 2 | ↓ | - | Human | VAT | Type 2 diabetes | Kim *et al.* 2014 [39] |
| Apolipoprotein O-like | ↓ | Q6UXV4 | Human | VAT | Type 2 diabetes | Kim *et al.* 2014 [39] |
| Dehydrogenase/reductase SDR family member 4 | ↓ | Q9BTZ2 | Human | VAT | Type 2 diabetes | Kim *et al.* 2014 [39] |
| Lactate dehydrogenase | ↓ | P07195 | Human | VAT (omental) | Gestational diabetes | Oliva *et al.* 2013 [36] |
| NADP-dependent malic enzyme, mitochondrial | ↓ | Q16798 | Human | VAT | Type 2 diabetes | Kim *et al.* 2014 [39] |
| MOSC domain-containing protein 2 | ↓ | Q922Q1 | Mouse | VAT and SAT | Insulin resistance | Ho *et al*. 2013 [41] |
| NAD kinase domain containing 1 | ↓ | Q4G0N4 | Human | VAT | Type 2 diabetes | Kim *et al.* 2014 [39] |
| Nucleoside diphosphate kinase B | ↓ | Q01768 | Mouse | VAT and SAT | Insulin resistance | Ho *et al*. 2013 [41] |
| Pyruvate carboxylase | ↓ | P11498 | Human | VAT | Type 2 diabetes | Kim *et al.* 2014 [39] |
| Retinal dehydrogenase 1 | ↓ | P00352 | Human | VAT | Type 2 diabetes | Murri *et al.* 2013 [35] |
| Acyl-CoA synthetase short-chain family member 1 | ↑ | Q9NUB1 | Human | VAT | Type 2 diabetes | Kim *et al.* 2014 [39] |
| Alcohol dehydrogenase iron-containing 1 | ↑ | Q8IWW8 | Human | VAT | Type 2 diabetes | Kim *et al.* 2014 [39] |
| Alcohol dehydrogenase 1C subunit gamma | ↑ | P00326 | Human | VAT | Type 2 diabetes | Kim *et al.* 2014 [39] |
| Aldehyde dehydrogenase | ↑ | P05091 | Human | SAT | Insulin resistance | Boden *et al*. 2008 [34] |
| Aldehyde dehydrogenase | ↑ | P05091 | Human | VAT | Type 2 diabetes | Murri *et al.* 2013 [35] |
| Aldose reductase | ↑ | P45376 | Mouse | VAT and SAT | Insulin resistance | Ho *et al*. 2013 [41] |
| ATP synthase subunit beta | ↑ | P06576 | Human | SAT | Insulin resistance | Boden *et al*. 2008 [34] |
| Carbonic anhydrase 1 | ↑ | P00915 | Human | SAT | Insulin resistance | Boden *et al*. 2008 [34] |
| Carbonic anhydrase 3 | ↑ | P16015 | Mouse | VAT and SAT | Insulin resistance | Ho *et al*. 2013 [41] |
| Cytoplasmic aconitase | ↑ | Q8VDC3 | Mouse | VAT and SAT | Insulin resistance | Ho *et al*. 2013 [41] |
| Fucokinase | ↑ | Q8N0W3 | Human | VAT | Type 2 diabetes | Kim *et al.* 2014 [39] |
| Lysozyme | ↑ | B2R4C5 | Human | VAT | Type 2 diabetes | Kim *et al.* 2014 [39] |
| Succinyl-CoA:3-ketoacid-coenzyme A transferase 1 | ↑ | Q9D0K2 | Mouse | VAT and SAT | Insulin resistance | Ho *et al*. 2013 [41] |
|  |  |  |  |  |  |  |
| **1.1 Electron transport chain/ATPase activity** |  |  |  |  |  |  |
| Arsa arsenite transporter, ATP-binding | ↓ | O43681 | Human | VAT | Type 2 diabetes | Kim *et al.* 2014 [39] |
| ATP synthase subunit d | ↓ | Q9DCX2 | Mouse | VAT and SAT | Insulin resistance | Ho *et al*. 2013 [41] |
| ATP synthase subunit g, mitochondrial | ↓ | O75964 | Human | VAT | Type 2 diabetes | Kim *et al.* 2014 [39] |
| Cytochrome c oxidase subunit 3 | ↓ | P00416 | Mouse | VAT and SAT | Insulin resistance | Ho *et al*. 2013 [41] |
| Cytochrome c oxidase subunit 7B | ↓ | P56393 | Mouse | VAT and SAT | Insulin resistance | Ho *et al*. 2013 [41] |
| Cytochrome c oxidase subunit 5A | ↓ | P20674 | Human | VAT | Type 2 diabetes | Kim *et al.* 2014 [39] |
| Cytochrome c oxidase subunit 6C | ↓ | P09669 | Human | VAT | Type 2 diabetes | Kim *et al.* 2014 [39] |
| Cytochrome c oxidase subunit 7A2 | ↓ | P14406 | Human | VAT | Type 2 diabetes | Kim *et al.* 2014 [39] |
| Cytochrome c 1 | ↓ | P08574 | Human | VAT | Type 2 diabetes | Kim *et al.* 2014 [39] |
| Cytochrome P450 2F2 | ↓ | P33267 | Mouse | VAT and SAT | Insulin resistance | Ho *et al*. 2013 [41] |
| NADH dehydrogenase 1 alpha subcomplex subunit 2 | ↓ | Q9CQ75 | Mouse | VAT and SAT | Insulin resistance | Ho *et al*. 2013 [41] |
| NADH dehydrogenase 1 alpha subcomplex subunit 8 | ↓ | P51970 | Human | VAT | Type 2 diabetes | Kim *et al.* 2014 [39] |
| NADH dehydrogenase flavoprotein 3 | ↓ | P56181 | Human | VAT | Type 2 diabetes | Kim *et al.* 2014 [39] |
| Ubiquinol-cytochrome c reductase complex core protein I | ↓ | Q9CZ13 | Mouse | WAT | Insulin resistance | Schmid *et al.* 2004 [37] |
| Ubiquinol-cytochrome c reductase complex core protein I | ↓ | P31930 | Human | VAT | Type 2 diabetes | Kim *et al.* 2014 [39] |
| ATP-binding cassette sub-family B member 9 | ↑ | Q6P2Q0 | Human | VAT | Type 2 diabetes | Kim *et al.* 2014 [39] |
| CDGSH iron sulfur domain 1 | ↑ | Q9NZ45 | Human | VAT | Type 2 diabetes | Kim *et al.* 2014 [39] |
| Creatine kinase M-type | ↑ | P07310 | Mouse | VAT and SAT | Insulin resistance | Ho *et al*. 2013 [41] |
| Cytochrome b-c1 complex subunit Rieske | ↑ | Q9CR68 | Mouse | VAT and SAT | Insulin resistance | Ho *et al*. 2013 [41] |
| Cytochrome c oxidase polypeptide 7A1 | ↑ | P56392 | Mouse | VAT and SAT | Insulin resistance | Ho *et al*. 2013 [41] |
| Cytochrome c oxidase subunit 6C | ↑ | Q9CPQ1 | Mouse | VAT and SAT | Insulin resistance | Ho *et al*. 2013 [41] |
| E2 components of pyruvate dehydrogenase complex | ↑ | Q8BMF4 | Mouse | BAT | Insulin resistance | Schmid *et al.* 2004 [37] |
| Electron transfer flavoprotein subunit alpha | ↑ | Q99LC5 | Mouse | VAT and SAT | Insulin resistance | Ho *et al*. 2013 [41] |
| Uncharacterized protein KIAA0564 homolog isoform 1 | ↑ | Q8CC88 | Mouse | VAT and SAT | Insulin resistance | Ho *et al*. 2013 [41] |
| Mitochondrial BAT uncoupling protein 1 | ↑ | P12242 | Mouse | VAT and SAT | Insulin resistance | Ho *et al*. 2013 [41] |
| NADH dehydrogenase 1 beta subcomplex subunit 8 | ↑ | O95169 | Human | VAT | Type 2 diabetes | Kim *et al.* 2014 [39] |
| NADH dehydrogenase 1 alpha subcomplex subunit 2 | ↑ | O43678 | Human | VAT | Type 2 diabetes | Kim *et al.* 2014 [39] |
| Sarcoplasmic/endoplasmic reticulum calcium ATPase 1 | ↑ | F6RQN3 | Mouse | VAT and SAT | Insulin resistance | Ho *et al*. 2013 [41] |
| Ubiquinol-cytochrome c reductase complex core protein I | ↑ | Q9CZ13 | Mouse | BAT | Insulin resistance | Schmid *et al.* 2004 [37] |
| V-type proton ATPase subunit H | ↑ | Q8BVE3 | Mouse | VAT and SAT | Insulin resistance | Ho *et al*. 2013 [41] |
|  |  |  |  |  |  |  |
| **1.2 Glucose metabolism** |  |  |  |  |  |  |
| Alpha-enolase | ↓ | P06733 | Human | SAT | Insulin resistance | Boden *et al*. 2008 [34] |
| Alpha-enolase | ↓ | P17182 | Mouse | WAT | Insulin resistance | Schmid *et al.* 2004 [37] |
| Alpha-enolase | ↓ | P17182 | Mouse | BAT | Insulin resistance | Schmid *et al.* 2004 [37] |
| Bisphosphoglycerate mutase | ↓ | P07738 | Human | VAT | Type 2 diabetes | Kim *et al.* 2014 [39] |
| Dicarbonyl/L-xylulose reductase | ↓ | Q7Z4W1 | Human | VAT | Type 2 diabetes | Kim *et al.* 2014 [39] |
| GDP-mannose 4,6-dehydratase | ↓ | O60547 | Human | VAT | Type 2 diabetes | Kim *et al.* 2014 [39] |
| Hexokinase 2 | ↓ | O08528 | Mouse | VAT and SAT | Insulin resistance | Ho *et al*. 2013 [41] |
| Hexokinase 3 | ↓ | P52790 | Human | VAT | Type 2 diabetes | Kim *et al.* 2014 [39] |
| Phosphoenolpyruvate carboxykinase 2 | ↓ | Q16822 | Human | VAT | Type 2 diabetes | Kim *et al.* 2014 [39] |
| Phosphoglucomutase 2-like 1 | ↓ | Q6PCE3 | Human | VAT | Type 2 diabetes | Kim *et al.* 2014 [39] |
| Phosphorylase kinase gamma 1 | ↓ | Q16816 | Human | VAT | Type 2 diabetes | Kim *et al.* 2014 [39] |
| Pyruvate dehydrogenase alpha 2 | ↓ | P29803 | Human | VAT | Type 2 diabetes | Kim *et al.* 2014 [39] |
| Pyruvate dehydrogenase beta | ↓ | P11177 | Human | VAT | Type 2 diabetes | Kim *et al.* 2014 [39] |
| Pyruvate dehydrogenase kinase isozyme 1 | ↓ | Q8BFP9 | Mouse | VAT and SAT | Insulin resistance | Ho *et al*. 2013 [41] |
| Pyruvate dehydrogenase kinase isozyme 2 | ↓ | Q15119 | Human | VAT | Type 2 diabetes | Kim *et al.* 2014 [39] |
| UDP-glucuronosyltransferase 1-7C | ↓ | D3Z7G0 | Mouse | VAT and SAT | Insulin resistance | Ho *et al*. 2013 [41] |
| 6-phosphofructokinase | ↑ | Q8C605 | Mouse | VAT and SAT | Insulin resistance | Ho *et al*. 2013 [41] |
| Alveolar soft part sarcoma chromosome region candidate gene 1 | ↑ | Q9BZE9 | Human | VAT | Type 2 diabetes | Kim *et al.* 2014 [39] |
| Beta-enolase | ↑ | P21550 | Mouse | VAT and SAT | Insulin resistance | Ho *et al*. 2013 [41] |
| Galactosidase beta 1 | ↑ | P16278 | Human | VAT | Type 2 diabetes | Kim *et al.* 2014 [39] |
| Glycosyltransferase 25 domain containing 1 | ↓ | Q6IPW8 | Human | VAT | Type 2 diabetes | Kim *et al.* 2014 [39] |
| Ribose 5-phosphate isomerase A | ↑ | P49247 | Human | VAT | Type 2 diabetes | Kim *et al.* 2014 [39] |
| Similar to glyceraldehyde-3-phosphate dehydrogenase isoform 1 | ↑ | - | Mouse | VAT and SAT | Insulin resistance | Ho *et al*. 2013 [41] |
| Triosephosphate isomerase 1 | ↑ | P60174 | Mouse | VAT and SAT | Insulin resistance | Ho *et al*. 2013 [41] |
|  |  |  |  |  |  |  |
| **1.3 Lipid metabolism** |  |  |  |  |  |  |
| Acetoacetyl-CoA synthetase | ↓ | Q9D2R0 | Mouse | VAT and SAT | Insulin resistance | Ho *et al*. 2013 [41] |
| Acetyl-CoA carboxylase beta | ↓ | Q6JIZ0 | Mouse | VAT and SAT | Insulin resistance | Ho *et al*. 2013 [41] |
| Acetyl-CoA carboxylase beta | ↓ | O00763 | Human | VAT | Type 2 diabetes | Kim *et al.* 2014 [39] |
| Acyl-CoA dehydrogenase, long chain | ↓ | P28330 | Human | VAT | Type 2 diabetes | Kim *et al.* 2014 [39] |
| Acyl-CoA dehydrogenase, C-4 to C-12 straight chain | ↓ | P11310 | Human | VAT | Type 2 diabetes | Kim *et al.* 2014 [39] |
| Acyl-CoA thioesterase 9 | ↓ | Q9Y305 | Human | VAT | Type 2 diabetes | Kim *et al.* 2014 [39] |
| Acyl-CoA synthetase long-chain family member 1 | ↓ | P33121 | Human | VAT | Type 2 diabetes | Kim *et al.* 2014 [39] |
| Acyl-CoA synthetase short-chain family member 2 | ↓ | Q9NR19 | Human | VAT | Type 2 diabetes | Kim *et al.* 2014 [39] |
| Apolipoprotein A-II | ↓ | A7YL62 | Mouse | VAT and SAT | Insulin resistance | Ho *et al*. 2013 [41] |
| Apolipoprotein A-IV | ↓ | P06727 | Human | VAT | Type 2 diabetes | Kim *et al.* 2014 [39] |
| Apolipoprotein B | ↓ | Q7Z7Q0 | Human | VAT | Type 2 diabetes | Kim *et al.* 2014 [39] |
| Apolipoprotein D | ↓ | P05090 | Human | VAT | Type 2 diabetes | Kim *et al.* 2014 [39] |
| ATP citrate lyase | ↓ | P53396 | Human | VAT | Type 2 diabetes | Kim *et al.* 2014 [39] |
| N-acylsphingosine amidohydrolase 1, acid ceramidase | ↓ | Q13510 | Human | VAT | Type 2 diabetes | Kim *et al.* 2014 [39] |
| Carbonyl reductase 4 | ↓ | Q8N4T8 | Human | VAT | Type 2 diabetes | Kim *et al.* 2014 [39] |
| Carnitine palmitoyltransferase 2 | ↓ | P23786 | Human | VAT | Type 2 diabetes | Kim *et al.* 2014 [39] |
| Corticosteroid 11-beta-dehydrogenase isozyme 1 | ↓ | P50172 | Mouse | VAT and SAT | Insulin resistance | Ho *et al*. 2013 [41] |
| Enoyl CoA hydratase, mitochondrial | ↓ | P30084 | Human | VAT | Type 2 diabetes | Kim *et al.* 2014 [39] |
| Fatty acid binding protein 4 | ↓ | P15090 | Human | VAT (omental) | Gestational diabetes | Oliva *et al.* 2013 [36] |
| Fatty acid synthase | ↓ | P49327 | Human | VAT | Type 2 diabetes | Kim *et al.* 2014 [39] |
| Fatty acid synthase | ↓ | P19096 | Mouse | VAT and SAT | Insulin resistance | Ho *et al*. 2013 [41] |
| Glycerol-3-phosphate acyltransferase 1 | ↓ | Q61586 | Mouse | VAT and SAT | Insulin resistance | Ho *et al*. 2013 [41] |
| Acetyl-CoA carboxylase 1 isoform 1 | ↓ | Q5SWU9-1 | Mouse | VAT and SAT | Insulin resistance | Ho *et al*. 2013 [41] |
| Perilipin 1 | ↓ | O60240 | Human | VAT (omental) | Gestational diabetes | Oliva *et al.* 2013 [36] |
| Perilipin 1 | ↓ | O60240 | Human | VAT | Type 2 diabetes | Kim *et al.* 2014 [39] |
| Perilipin 4 | ↓ | Q96Q06 | Human | VAT | Type 2 diabetes | Kim *et al.* 2014 [39] |
| Prostacyclin synthase | ↓ | O35074 | Mouse | VAT and SAT | Insulin resistance | Ho *et al*. 2013 [41] |
| Thyroid hormone-inducible hepatic protein | ↓ | Q62264 | Mouse | VAT and SAT | Insulin resistance | Ho *et al*. 2013 [41] |
| Trifunctional enzyme subunit alpha, mitochondrial | ↓ | Q8BMS1 | Mouse | BAT | Insulin resistance | Schmid *et al.* 2004 [37] |
| 3-ketoacyl-CoA thiolase | ↑ | Q8BWT1 | Mouse | VAT and SAT | Insulin resistance | Ho *et al*. 2013 [41] |
| Acyl carrier protein | ↑ | F6ZFT1 | Mouse | VAT and SAT | Insulin resistance | Ho *et al*. 2013 [41] |
| Acyl-CoA-binding protein | ↑ | P11030 | Rat | VAT (epididymal) | Insulin resistance | Berti *et al*. 2012 [40] |
| Apolipoprotein A-I | ↑ | O09042 | Mouse | VAT and SAT | Insulin resistance | Ho *et al*. 2013 [41] |
| Apolipoprotein A-IV | ↑ | P06727 | Human | VAT | Type 2 diabetes | Murri *et al.* 2013 [35] |
| Apolipoprotein E | ↑ | P02649 | Human | VAT | Type 2 diabetes | Kim *et al.* 2014 [39] |
| Carboxylesterase 3 | ↑ | Q8VCT4 | Mouse | VAT and SAT | Insulin resistance | Ho *et al*. 2013 [41] |
| Carnitine palmitoyltransferase 1A | ↑ | P50416 | Human | VAT | Type 2 diabetes | Kim *et al.* 2014 [39] |
| Carnitine palmitoyltransferase 1B | ↑ | Q924X2 | Mouse | VAT and SAT | Insulin resistance | Ho *et al*. 2013 [41] |
| Cell death activator CIDE-3 | ↑ | P56198 | Mouse | VAT and SAT | Insulin resistance | Ho *et al*. 2013 [41] |
| Dodecenoyl-coenzyme A delta isomerase precursor | ↑ | P42126 | Mouse | VAT and SAT | Insulin resistance | Ho *et al*. 2013 [41] |
| Fatty acid binding protein 1 | ↑ | P07148 | Human | VAT | Type 2 diabetes | Kim *et al.* 2014 [39] |
| Fatty acid binding protein 4 | ↑ | P15090 | Human | VAT | Type 2 diabetes | Kim *et al.* 2014 [39] |
| Geranylgeranyl diphosphate synthase 1 | ↑ | O95749 | Human | VAT | Type 2 diabetes | Kim *et al.* 2014 [39] |
| Glycerol-3-phosphate dehydrogenase | ↑ | P13707 | Mouse | VAT and SAT | Insulin resistance | Ho *et al*. 2013 [41] |
| Lipoamide acyltransferase component of α-keto acid dehydrogenase | ↑ | P53395 | Mouse | BAT | Insulin resistance | Schmid *et al.* 2004 [37] |
| Long-chain specific acyl-CoA dehydrogenase | ↑ | P51174 | Mouse | VAT and SAT | Insulin resistance | Ho *et al*. 2013 [41] |
| Medium-chain specific acyl-CoA dehydrogenase | ↑ | P45952 | Mouse | VAT and SAT | Insulin resistance | Ho *et al*. 2013 [41] |
| Methylmalonyl CoA epimerase | ↑ | Q96PE7 | Human | VAT | Type 2 diabetes | Kim *et al.* 2014 [39] |
| Perilipin 1 | ↑ | O60240 | Human | SAT | Insulin resistance | Boden *et al*. 2008 [34] |
| Phospholipase B-like 1 | ↑ | Q6P4A8 | Human | VAT | Type 2 diabetes | Kim *et al.* 2014 [39] |
| Trifunctional enzyme subunit beta | ↑ | D3YXU1 | Mouse | VAT and SAT | Insulin resistance | Ho *et al*. 2013 [41] |
| Uncharacterized protein C1orf93 homolog | ↑ | Q9DB60 | Mouse | VAT and SAT | Insulin resistance | Ho *et al*. 2013 [41] |
| Very long-chain specific acyl-CoA dehydrogenase | ↑ | P50544 | Mouse | VAT and SAT | Insulin resistance | Ho *et al*. 2013 [41] |
|  |  |  |  |  |  |  |
| **1.4 Protein metabolism** |  |  |  |  |  |  |
| aarF domain-containing protein kinase 3 | ↓ | Q8NI60 | Human | VAT | Type 2 diabetes | Kim *et al.* 2014 [39] |
| Carboxypeptidase N polypeptide 1 | ↓ | P15169 | Human | VAT | Type 2 diabetes | Kim *et al.* 2014 [39] |
| Cysteine conjugate-beta lyase 2 | ↓ | Q6YP21 | Human | VAT | Type 2 diabetes | Kim *et al.* 2014 [39] |
| Dihydrolipoamide dehydrogenase | ↓ | P11182 | Human | VAT | Type 2 diabetes | Kim *et al.* 2014 [39] |
| Dolichyl-diphosphooligosaccharide--protein glycosyltransferase subunit STT3B | ↓ | Q3TDQ1 | Mouse | VAT and SAT | Insulin resistance | Ho *et al*. 2013 [41] |
| E3 ubiquitin-protein ligase MARCH5 | ↓ | Q3KNM2 | Mouse | VAT and SAT | Insulin resistance | Ho *et al*. 2013 [41] |
| Eukaryotic translation initiation factor 3 subunit C-like protein | ↓ | B5ME19 | Human | VAT | Type 2 diabetes | Kim *et al.* 2014 [39] |
| Glutamic-oxaloacetic transaminase 1 | ↓ | P17174 | Human | VAT | Type 2 diabetes | Kim *et al.* 2014 [39] |
| Leucyl/cystinyl aminopeptidase | ↓ | Q9UIQ6 | Human | VAT | Type 2 diabetes | Kim *et al.* 2014 [39] |
| Methionyl aminopeptidase 2 | ↓ | P50579 | Human | VAT | Type 2 diabetes | Kim *et al.* 2014 [39] |
| Proteasome 26S non-ATPase subunit 3 | ↓ | O43242 | Human | VAT | Type 2 diabetes | Kim *et al.* 2014 [39] |
| Proteasome 26S non-ATPase subunit 9 | ↓ | O00233 | Human | VAT | Type 2 diabetes | Kim *et al.* 2014 [39] |
| Proteasome 26S subunit ATPase 3 | ↓ | P17980 | Human | VAT | Type 2 diabetes | Kim *et al.* 2014 [39] |
| Ubiquitin specific peptidase 5 | ↓ | P45974 | Human | VAT | Type 2 diabetes | Kim *et al.* 2014 [39] |
| Eukaryotic translation initiation factor 3 subunit A | ↑ | Q14152 | Human | VAT | Type 2 diabetes | Kim *et al.* 2014 [39] |
| Alanyl aminopeptidase | ↑ | P15144 | Human | VAT | Type 2 diabetes | Kim *et al.* 2014 [39] |
| Calpastatin | ↑ | P20810 | Human | VAT | Type 2 diabetes | Kim *et al.* 2014 [39] |
| Dolichyl-diphosphooligosaccharide--protein glycosyltransferase | ↑ | P39656 | Human | VAT | Type 2 diabetes | Kim *et al.* 2014 [39] |
| Glia maturation factor gamma | ↑ | O60234 | Human | VAT | Type 2 diabetes | Kim *et al.* 2014 [39] |
| Isoleucyl-tRNA synthetase | ↑ | Q8BU30 | Mouse | VAT and SAT | Insulin resistance | Ho *et al*. 2013 [41] |
| Mast cell carboxypeptidase A | ↑ | P15089 | Mouse | VAT and SAT | Insulin resistance | Ho *et al*. 2013 [41] |
| Mitochondrial-processing peptidase subunit beta | ↑ | O75439 | Human | VAT | Type 2 diabetes | Kim *et al.* 2014 [39] |
| Myeloblastin | ↑ | P24158 | Human | VAT | Type 2 diabetes | Kim *et al.* 2014 [39] |
| Peptidyl arginine deiminase type-2 | ↑ | Q96DA7 | Human | VAT | Type 2 diabetes | Kim *et al.* 2014 [39] |
| Proteasome subunit beta type-8 | ↑ | P28062 | Human | VAT | Type 2 diabetes | Kim *et al.* 2014 [39] |
| Proteasome 26S non-ATPase subunit 5 | ↑ | Q16401 | Human | VAT | Type 2 diabetes | Kim *et al.* 2014 [39] |
| Protein-cysteine N-palmitoyltransferase HHAT-like protein | ↑ | Q9D1G3 | Mouse | VAT and SAT | Insulin resistance | Ho *et al*. 2013 [41] |
| Protein disulfide-isomerase A3 | ↑ | P30101 | Human | SAT | Insulin resistance | Boden et al. 2008 [34] |
| SMT3 suppressor of mif two 3 homolog 2 | ↑ | P61956 | Human | VAT | Type 2 diabetes | Kim *et al.* 2014 [39] |
| Sulfatase modifying factor 2 | ↑ | Q8NBJ7 | Human | VAT | Type 2 diabetes | Kim *et al.* 2014 [39] |
| Tyrosyl-tRNA synthetase | ↑ | P54577 | Human | VAT | Type 2 diabetes | Kim *et al.* 2014 [39] |
| Ubiquitin-like modifier activating enzyme 3 | ↑ | Q8TBC4 | Human | VAT | Type 2 diabetes | Kim *et al.* 2014 [39] |
| Ubiquitin-like modifier activating enzyme 6 | ↑ | A0AVT1 | Human | VAT | Type 2 diabetes | Kim *et al.* 2014 [39] |
| Ubiquitin-conjugating enzyme E2I | ↑ | P63279 | Human | VAT | Type 2 diabetes | Kim *et al.* 2014 [39] |
| Ubiquitination factor E4A | ↑ | Q14139 | Human | VAT | Type 2 diabetes | Kim *et al.* 2014 [39] |
|  |  |  |  |  |  |  |
| **1.5 Tricarboxylic acid cycle metabolism** |  |  |  |  |  |  |
| Cytoplasmic malate dehydrogenase | ↓ | P14152 | Mouse | BAT | Insulin resistance | Schmid *et al.* 2004 [37] |
| Citrate synthase | ↓ | O75390 | Human | VAT | Type 2 diabetes | Kim *et al.* 2014 [39] |
| Fumarate hydratase | ↓ | P07954 | Human | VAT | Type 2 diabetes | Kim *et al.* 2014 [39] |
| Glutamate dehydrogenase 1 | ↓ | P00367 | Human | VAT | Type 2 diabetes | Kim *et al.* 2014 [39] |
| Oxoglutarate dehydrogenase | ↓ | A2VCT2 | Human | VAT | Type 2 diabetes | Kim *et al.* 2014 [39] |
| Succinate-CoA ligase, GDP-forming, subunit beta, mitochondrial | ↓ | Q96I99 | Human | VAT | Type 2 diabetes | Kim *et al.* 2014 [39] |
| Aconitate hydratase, mitochondrial | ↑ | Q99KI0 | Mouse | VAT and SAT | Insulin resistance | Ho *et al*. 2013 [41] |
| ATP-specific succinyl-CoA synthetase subunit beta | ↑ | Q9Z2I9 | Mouse | BAT | Insulin resistance | Schmid *et al.* 2004 [37] |
| E2 components of 2-oxoglutarate dehydrogenase | ↑ | Q9D2G2 | Mouse | BAT | Insulin resistance | Schmid *et al.* 2004 [37] |
|  |  |  |  |  |  |  |
| **2. Immune response / Inflammation** |  |  |  |  |  |  |
| Alpha-1-antitrypsin | ↓ | P01009 | Human | VAT (omental) | Gestational diabetes | Oliva *et al.* 2013 [36] |
| Annexin A1 | ↓ | P04083 | Human | VAT | Type 2 diabetes | Murri *et al.* 2013 [35] |
| Annexin A5 | ↓ | P08758 | Human | VAT (omental) | Gestational diabetes | Oliva *et al.* 2013 [36] |
| Carbonic anhydrase III, muscle specific | ↓ | P07451 | Human | VAT | Type 2 diabetes | Kim *et al.* 2014 [39] |
| Complement C1r subcomponent | ↓ | P00736 | Human | VAT | Type 2 diabetes | Kim *et al.* 2014 [39] |
| Complement component 7 | ↓ | P10643 | Human | VAT | Type 2 diabetes | Kim *et al.* 2014 [39] |
| Complement factor H | ↓ | P08603 | Human | VAT | Type 2 diabetes | Kim *et al.* 2014 [39] |
| Galectin 3 | ↓ | P17931 | Human | VAT | Type 2 diabetes | Kim *et al.* 2014 [39] |
| H-2 class II histocompatibility antigen | ↓ | P14483 | Mouse | VAT and SAT | Insulin resistance | Ho *et al*. 2013 [41] |
| Ig kappa chain V-IV region | ↓ | P06312 | Human | VAT | Type 2 diabetes | Kim *et al.* 2014 [39] |
| Immunoglobulin lambda variable 7-46 | ↓ | Q5NV83 | Human | VAT | Type 2 diabetes | Kim *et al.* 2014 [39] |
| Major histocompatibility complex, class II, DR alpha chain | ↓ | P01903 | Human | VAT | Type 2 diabetes | Kim *et al.* 2014 [39] |
| Mannan-binding lectin serine peptidase 1 | ↓ | P48740 | Human | VAT | Type 2 diabetes | Kim *et al.* 2014 [39] |
| MCG129835 | ↓ | Q31290 | Mouse | VAT and SAT | Insulin resistance | Ho *et al*. 2013 [41] |
| Annexin A3 | ↑ | P12429 | Human | VAT | Type 2 diabetes | Kim *et al.* 2014 [39] |
| Annexin A7 | ↑ | P20073 | Human | VAT | Type 2 diabetes | Kim *et al.* 2014 [39] |
| Arachidonate 5-lipoxygenase-activating protein | ↑ | P20292 | Human | VAT | Type 2 diabetes | Kim *et al.* 2014 [39] |
| Azurocidin 1 | ↑ | P20160 | Human | VAT | Type 2 diabetes | Kim *et al.* 2014 [39] |
| Bactericidal/permeability-increasing protein | ↑ | P17213 | Human | VAT | Type 2 diabetes | Kim *et al.* 2014 [39] |
| Bone marrow stromal antigen 2 | ↑ | Q8R2Q8 | Mouse | VAT and SAT | Insulin resistance | Ho *et al*. 2013 [41] |
| Carcinoembryonic antigen-related cell adhesion molecule 8 | ↑ | P31997 | Human | VAT | Type 2 diabetes | Kim *et al.* 2014 [39] |
| Cathelicidin antimicrobial peptide | ↑ | P49913 | Human | VAT | Type 2 diabetes | Kim *et al.* 2014 [39] |
| Cathepsin G | ↑ | P08311 | Human | VAT | Type 2 diabetes | Kim *et al.* 2014 [39] |
| CD276 molecule | ↑ | Q5ZPR3 | Human | VAT | Type 2 diabetes | Kim *et al.* 2014 [39] |
| CD74 molecule class II invariant chain | ↑ | P04233 | Human | VAT | Type 2 diabetes | Kim *et al.* 2014 [39] |
| Complement C1q subcomponent subunit A | ↑ | P02745 | Human | VAT | Type 2 diabetes | Kim *et al.* 2014 [39] |
| Complement factor H-related 1 | ↑ | Q03591 | Human | VAT | Type 2 diabetes | Kim *et al.* 2014 [39] |
| Defensin alpha 3 | ↑ | P59666 | Human | VAT | Type 2 diabetes | Kim *et al.* 2014 [39] |
| Ectopic P granules protein 5 homolog | ↑ | Q9HCE0 | Human | VAT | Type 2 diabetes | Kim *et al.* 2014 [39] |
| Fibronectin 1 | ↑ | P02751 | Human | VAT | Type 2 diabetes | Kim *et al.* 2014 [39] |
| Ficolin 1 | ↑ | O00602 | Human | VAT | Type 2 diabetes | Kim *et al.* 2014 [39] |
| FK506-binding protein 1A | ↑ | Q62658 | Rat | VAT (epididymal) | Insulin resistance | Berti *et al*. 2012 [40] |
| Galectin 3 | ↑ | P16110 | Mouse | VAT and SAT | Insulin resistance | Ho *et al*. 2013 [41] |
| Gamma interferon-inducible protein 16 | ↑ | Q16666 | Human | VAT | Type 2 diabetes | Kim *et al.* 2014 [39] |
| Gamma interferon-inducible protein 30 | ↑ | P13284 | Human | VAT | Type 2 diabetes | Kim *et al.* 2014 [39] |
| Guanylate binding protein 1, interferon-inducible | ↑ | P32455 | Human | VAT | Type 2 diabetes | Kim *et al.* 2014 [39] |
| Hyaluronoglucosaminidase 3 | ↑ | O43820 | Human | VAT | Type 2 diabetes | Kim *et al.* 2014 [39] |
| Ig kappa chain C region | ↑ | P01834 | Human | VAT | Type 2 diabetes | Murri *et al.* 2013 [35] |
| Ig kappa chain C region | ↑ | P01834 | Human | VAT | Type 2 diabetes | Kim *et al.* 2014 [39] |
| Ig lambda-1 chain C regions | ↑ | P0CG04 | Human | VAT | Type 2 diabetes | Kim *et al.* 2014 [39] |
| Ig mu chain C region | ↑ | P01871 | Human | VAT | Type 2 diabetes | Kim *et al.* 2014 [39] |
| Immunoglobulin lambda variable 1-44 | ↑ | Q5NV81 | Human | VAT | Type 2 diabetes | Kim *et al.* 2014 [39] |
| Immunoglobulin lambda-like polypeptide 1 | ↑ | P15814 | Human | VAT | Type 2 diabetes | Kim *et al.* 2014 [39] |
| Immunoglobulin superfamily containing leucine-rich repeat protein | ↑ | O14498 | Human | VAT | Type 2 diabetes | Kim *et al.* 2014 [39] |
| Interleukin 1 receptor type II | ↑ | P27931 | Mouse | VAT and SAT | Insulin resistance | Ho *et al*. 2013 [41] |
| Interleukin 16 | ↑ | Q14005 | Human | VAT | Type 2 diabetes | Kim *et al.* 2014 [39] |
| Lactotransferrin | ↑ | P02788 | Human | VAT | Type 2 diabetes | Kim *et al.* 2014 [39] |
| Lipocalin 2 | ↑ | P80188 | Human | VAT | Type 2 diabetes | Kim *et al.* 2014 [39] |
| Lipopolysaccharide binding protein | ↑ | P18428 | Human | VAT | Type 2 diabetes | Kim *et al.* 2014 [39] |
| Major histocompatibility complex, class II, DR beta 1 chain | ↑ | Q95IE3 | Human | VAT | Type 2 diabetes | Kim *et al.* 2014 [39] |
| Matrix metallopeptidase 8 | ↑ | P22894 | Human | VAT | Type 2 diabetes | Kim *et al.* 2014 [39] |
| Matrix metallopeptidase 9 | ↑ | P14780 | Human | VAT | Type 2 diabetes | Kim *et al.* 2014 [39] |
| Myeloid cell nuclear differentiation antigen | ↑ | P41218 | Human | VAT | Type 2 diabetes | Kim *et al.* 2014 [39] |
| Myxovirus resistance protein 1 | ↑ | P20591 | Human | VAT | Type 2 diabetes | Kim *et al.* 2014 [39] |
| Neprilysin | ↑ | Q61391 | Mouse | VAT and SAT | Insulin resistance | Ho *et al*. 2013 [41] |
| Neutrophil cytosolic factor 1 | ↑ | P14598 | Human | VAT | Type 2 diabetes | Kim *et al.* 2014 [39] |
| Neutrophil cytosolic factor 1B pseudogene | ↑ | A6NI72 | Human | VAT | Type 2 diabetes | Kim *et al.* 2014 [39] |
| Neutrophil cytosolic factor 1C pseudogene | ↑ | A8MVU1 | Human | VAT | Type 2 diabetes | Kim *et al.* 2014 [39] |
| Neutrophil cytosolic factor 2 | ↑ | P19878 | Human | VAT | Type 2 diabetes | Kim *et al.* 2014 [39] |
| Neutrophil elastase | ↑ | P08246 | Human | VAT | Type 2 diabetes | Kim *et al.* 2014 [39] |
| Pentraxin-related protein PTX3 | ↑ | P26022 | Human | VAT | Type 2 diabetes | Kim *et al.* 2014 [39] |
| Peptidoglycan recognition protein 1 | ↑ | O75594 | Human | VAT | Type 2 diabetes | Kim *et al.* 2014 [39] |
| Phospholipid scramblase 1 | ↑ | O15162 | Human | VAT | Type 2 diabetes | Kim *et al.* 2014 [39] |
| Proteoglycan 2 | ↑ | P13727 | Human | VAT | Type 2 diabetes | Kim *et al.* 2014 [39] |
| S100 calcium binding protein A8 | ↑ | P05109 | Human | VAT | Type 2 diabetes | Kim *et al.* 2014 [39] |
| S100 calcium binding protein A9 | ↑ | P06702 | Human | VAT | Type 2 diabetes | Kim *et al.* 2014 [39] |
| S100 calcium binding protein A9 | ↑ | P06702 | Human | VAT (omental) | Gestational diabetes | Oliva *et al.* 2013 [36] |
| SAM domain and HD domain-containing protein 1 | ↑ | Q9Y3Z3 | Human | VAT | Type 2 diabetes | Kim *et al.* 2014 [39] |
| Serpin peptidase inhibitor A1 | ↑ | P01009 | Human | VAT | Type 2 diabetes | Kim *et al.* 2014 [39] |
| Signal-regulatory protein alpha | ↑ | P78324 | Human | VAT | Type 2 diabetes | Kim *et al.* 2014 [39] |
| Signal-regulatory protein beta 1 | ↑ | O00241 | Human | VAT | Type 2 diabetes | Kim *et al.* 2014 [39] |
| Sushi domain containing 2 | ↑ | Q9UGT4 | Human | VAT | Type 2 diabetes | Kim *et al.* 2014 [39] |
| TIMP metallopeptidase inhibitor 1 | ↑ | P01033 | Human | VAT | Type 2 diabetes | Kim *et al.* 2014 [39] |
|  |  |  |  |  |  |  |
| **3. Stress response / Oxidative stress** |  |  |  |  |  |  |
| Glutathione S-transferase kappa 1 | ↓ | Q9Y2Q3 | Human | VAT | Type 2 diabetes | Kim *et al.* 2014 [39] |
| Glutathione S-transferase P | ↓ | P09211 | Human | VAT (omental) | Gestational diabetes | Oliva *et al.* 2013 [36] |
| Glutathione S-transferase theta 1 | ↓ | P30711 | Human | VAT | Type 2 diabetes | Kim *et al.* 2014 [39] |
| Heat shock protein 27 kDa | ↓ | P04792 | Human | VAT (omental) | Gestational diabetes | Oliva *et al.* 2013 [36] |
| Microsomal glutathione S-transferase 1 | ↓ | Q91VS7 | Mouse | VAT and SAT | Insulin resistance | Ho *et al*. 2013 [41] |
| Microsomal glutathione S-transferase 3 | ↓ | Q9CPU4 | Mouse | VAT and SAT | Insulin resistance | Ho *et al*. 2013 [41] |
| Nicotinamide nucleotide transhydrogenase precursor | ↓ | Q61941 | Mouse | VAT and SAT | Insulin resistance | Ho *et al*. 2013 [41] |
| Peroxiredoxin 6 | ↓ | P30041 | Human | VAT (omental) | Gestational diabetes | Oliva *et al.* 2013 [36] |
| 5-oxoprolinase | ↑ | Q8K010 | Mouse | VAT and SAT | Insulin resistance | Ho *et al*. 2013 [41] |
| Cytochrome b-245 heavy chain | ↑ | P04839 | Human | VAT | Type 2 diabetes | Kim *et al.* 2014 [39] |
| Eosinophil peroxidase | ↑ | P11678 | Human | VAT | Type 2 diabetes | Kim *et al.* 2014 [39] |
| Glutathione S-transferase Mu 2 | ↑ | P28161 | Human | VAT | Type 2 diabetes | Murri *et al.* 2013 [35] |
| Glutathione S-transferase P | ↑ | P09211 | Human | SAT | Insulin resistance | Boden *et al*. 2008 [34] |
| Heat shock protein 27 kDa | ↑ | P04792 | Human | VAT | Type 2 diabetes | Kim *et al.* 2014 [39] |
| Heat shock protein 70 kDa 2 | ↑ | P54652 | Human | VAT | Type 2 diabetes | Kim *et al.* 2014 [39] |
| Heat shock protein beta 1 | ↑ | P04792 | Human | SAT | Insulin resistance | Boden *et al*. 2008 [34] |
| Heat shock protein beta 6 | ↑ | O14558 | Human | VAT | Type 2 diabetes | Kim *et al.* 2014 [39] |
| Heat shock protein beta 6 | ↑ | O14558 | Human | SAT | Insulin resistance | Boden et al. 2008 [34] |
| Heat shock protein beta 60 kDa | ↑ | P10809 | Human | SAT | Insulin resistance | Boden *et al*. 2008 [34] |
| Heat shock protein beta 60 kDa | ↑ | P63038 | Mouse | BAT | Insulin resistance | Schmid *et al.* 2004 [37] |
| Heat shock protein beta 60 kDa isoform 1 | ↑ | P63038-1 | Mouse | VAT and SAT | Insulin resistance | Ho *et al*. 2013 [41] |
| Methionine sulfoxide reductase A | ↑ | Q9UJ68 | Human | VAT | Type 2 diabetes | Kim *et al.* 2014 [39] |
| Myeloperoxidase | ↑ | P05164 | Human | VAT | Type 2 diabetes | Kim *et al.* 2014 [39] |
| Peroxiredoxin 2 | ↑ | P32119 | Human | VAT | Type 2 diabetes | Murri *et al.* 2013 [35] |
| Peroxiredoxin 5 | ↑ | P99029-1 | Mouse | VAT and SAT | Insulin resistance | Ho *et al*. 2013 [41] |
| Superoxide dismutase | ↑ | P09671 | Mouse | VAT and SAT | Insulin resistance | Ho *et al*. 2013 [41] |
| Superoxide dismutase 2, mitochondrial | ↑ | P04179 | Human | VAT | Type 2 diabetes | Kim *et al.* 2014 [39] |
|  |  |  |  |  |  |  |
| **4. Structure (cytoskeleton and extracellular matrix)** |  |  |  |  |  |  |
| Actin binding LIM protein 1 | ↓ | O14639 | Human | VAT | Type 2 diabetes | Kim *et al.* 2014 [39] |
| Actin related protein 2/3 complex, subunit 2, 34 kDa | ↓ | Q53R19 | Human | VAT | Type 2 diabetes | Kim *et al.* 2014 [39] |
| Ankyrin 1 | ↓ | P16157 | Human | VAT | Type 2 diabetes | Kim *et al.* 2014 [39] |
| Cell surface glycoprotein MUC18 isoform 1 | ↓ | Q8R2Y2-1 | Mouse | VAT and SAT | Insulin resistance | Ho *et al*. 2013 [41] |
| Collagen alpha 1 (I) chain | ↓ | P02452 | Human | VAT | Type 2 diabetes | Kim *et al.* 2014 [39] |
| Collagen alpha 1 (I) chain isoform 1 | ↓ | P11087-1 | Mouse | VAT and SAT | Insulin resistance | Ho *et al*. 2013 [41] |
| Collagen alpha 1 (XV) chain | ↓ | O35206 | Mouse | VAT and SAT | Insulin resistance | Ho *et al*. 2013 [41] |
| Collagen alpha 2 (I) chain | ↓ | Q01149 | Mouse | VAT and SAT | Insulin resistance | Ho *et al*. 2013 [41] |
| Collagen alpha 2 (IV) chain | ↓ | P08122 | Mouse | VAT and SAT | Insulin resistance | Ho *et al*. 2013 [41] |
| Collagen alpha 2 (VI) chain | ↓ | P12110 | Human | VAT | Type 2 diabetes | Kim *et al.* 2014 [39] |
| Endophilin-B2 isoform 1 | ↓ | Q8R3V5-1 | Mouse | VAT and SAT | Insulin resistance | Ho *et al*. 2013 [41] |
| FERM domain-containing protein 4A | ↓ | Q9P2Q2 | Human | VAT | Type 2 diabetes | Kim *et al.* 2014 [39] |
| Keratin 84 | ↓ | Q9NSB2 | Human | VAT | Type 2 diabetes | Kim *et al.* 2014 [39] |
| Junction plakoglobin | ↓ | P14923 | Human | VAT | Type 2 diabetes | Kim *et al.* 2014 [39] |
| Lamin A/C | ↓ | P02545 | Human | VAT | Type 2 diabetes | Kim *et al.* 2014 [39] |
| Laminin alpha 2 | ↓ | P24043 | Human | VAT | Type 2 diabetes | Kim *et al.* 2014 [39] |
| MAP7 domain containing 3 | ↓ | Q8IWC1 | Human | VAT | Type 2 diabetes | Kim *et al.* 2014 [39] |
| Myosin IC | ↓ | A1L180 | Human | VAT | Type 2 diabetes | Kim *et al.* 2014 [39] |
| Myosin light chain kinase | ↓ | Q15746 | Human | VAT | Type 2 diabetes | Kim *et al.* 2014 [39] |
| Myosin heavy chain 13 | ↓ | Q9UKX3 | Human | VAT | Type 2 diabetes | Kim *et al.* 2014 [39] |
| PTK7 protein tyrosine kinase 7 | ↓ | Q13308 | Human | VAT | Type 2 diabetes | Kim *et al.* 2014 [39] |
| Spectrin alpha chain, non-erythrocytic 1 | ↓ | Q13813 | Human | VAT | Type 2 diabetes | Kim *et al.* 2014 [39] |
| Talin 2 | ↓ | Q9Y4G6 | Human | VAT | Type 2 diabetes | Kim *et al.* 2014 [39] |
| Thymosin beta 10 | ↓ | P63313 | Human | VAT | Type 2 diabetes | Kim *et al.* 2014 [39] |
| Tropomyosin beta chain | ↓ | P07951 | Human | VAT | Type 2 diabetes | Kim *et al.* 2014 [39] |
| Tubulin alpha 1a | ↓ | Q71U36 | Human | VAT | Type 2 diabetes | Kim *et al.* 2014 [39] |
| Tubulin alpha 1b | ↓ | Q8WU19 | Human | VAT | Type 2 diabetes | Kim *et al.* 2014 [39] |
| Vinculin | ↓ | P18206 | Human | VAT | Type 2 diabetes | Murri *et al.* 2013 [35] |
| Vinculin | ↓ | P18206 | Human | VAT (omental) | Gestational diabetes | Oliva *et al.* 2013 [36] |
| Actin | ↑ | - | Mouse | VAT and SAT | Insulin resistance | Ho *et al*. 2013 [41] |
| Actin, cytoplasmic 1 | ↑ | P60709 | Human | VAT | Type 2 diabetes | Kim *et al.* 2014 [39] |
| Actin, cytoplasmic 1 | ↑ | P60709 | Human | VAT | Type 2 diabetes | Murri *et al.* 2013 [35] |
| Alpha-actinin-3 | ↑ | O88990 | Mouse | VAT and SAT | Insulin resistance | Ho *et al*. 2013 [41] |
| Alpha-crystallin B chain | ↑ | P02511 | Human | SAT | Insulin resistance | Boden *et al*. 2008 [34] |
| ARPC4-TTLL3 | ↑ | H7C0A3 | Human | VAT | Type 2 diabetes | Kim *et al.* 2014 [39] |
| Biglycan | ↑ | Q3TNY9 | Mouse | VAT and SAT | Insulin resistance | Ho *et al*. 2013 [41] |
| Adenylate cyclase-associated protein 1 | ↑ | Q01518 | Human | VAT | Type 2 diabetes | Kim *et al.* 2014 [39] |
| CD44 molecule | ↑ | P16070 | Human | VAT | Type 2 diabetes | Kim *et al.* 2014 [39] |
| Centrosomal protein 152 kDa | ↑ | O94986 | Human | VAT | Type 2 diabetes | Kim *et al.* 2014 [39] |
| Cofilin 1 | ↑ | P23528 | Human | VAT | Type 2 diabetes | Kim *et al.* 2014 [39] |
| Cofilin 2 | ↑ | Q9Y281 | Human | VAT | Type 2 diabetes | Kim *et al.* 2014 [39] |
| Collagen alpha 1 (VI) chain | ↑ | P12109 | Human | VAT | Type 2 diabetes | Kim *et al.* 2014 [39] |
| Collagen alpha 1 (VI) chain | ↑ | P12109 | Human | VAT (omental) | Gestational diabetes | Oliva *et al.* 2013 [36] |
| Collagen alpha 2 (VI) chain | ↑ | P12110 | Human | VAT (omental) | Gestational diabetes | Oliva *et al.* 2013 [36] |
| Collagen alpha 3 (VI) chain | ↑ | P12111 | Human | VAT | Type 2 diabetes | Kim *et al.* 2014 [39] |
| Coronin 1A | ↑ | P31146 | Human | VAT | Type 2 diabetes | Kim *et al.* 2014 [39] |
| Desmin | ↑ | P17661 | Human | VAT | Type 2 diabetes | Kim *et al.* 2014 [39] |
| Elastin microfibril interfacer 1 | ↑ | Q9Y6C2 | Human | VAT | Type 2 diabetes | Kim *et al.* 2014 [39] |
| Endothelial cell adhesion molecule | ↑ | Q96AP7 | Human | VAT | Type 2 diabetes | Kim *et al.* 2014 [39] |
| Fermitin family member 3 | ↑ | Q86UX7 | Human | VAT | Type 2 diabetes | Kim *et al.* 2014 [39] |
| Flotillin 2 | ↑ | Q14254 | Human | VAT | Type 2 diabetes | Kim *et al.* 2014 [39] |
| KN motif and ankyrin repeat domain-containing protein 3 | ↑ | Q6NY19 | Human | VAT | Type 2 diabetes | Kim *et al.* 2014 [39] |
| Lumican | ↑ | P51884 | Human | VAT (omental) | Gestational diabetes | Oliva *et al.* 2013 [36] |
| Myosin light-chain polypeptide 6 | ↑ | P60660 | Human | SAT | Insulin resistance | Boden *et al*. 2008 [34] |
| Myosin light chain 1 | ↑ | P09542 | Mouse | VAT and SAT | Insulin resistance | Ho *et al*. 2013 [41] |
| Myosin 4 | ↑ | Q5SX39 | Mouse | VAT and SAT | Insulin resistance | Ho *et al*. 2013 [41] |
| Myosin 7 | ↑ | Q91Z83 | Mouse | VAT and SAT | Insulin resistance | Ho *et al*. 2013 [41] |
| PDZ and LIM domain 7 | ↑ | Q9NR12 | Human | VAT | Type 2 diabetes | Kim *et al.* 2014 [39] |
| Podocalyxin-like | ↑ | O00592 | Human | VAT | Type 2 diabetes | Kim *et al.* 2014 [39] |
| Receptor-type tyrosine-protein phosphatase F | ↑ | P10586 | Human | VAT | Type 2 diabetes | Kim *et al.* 2014 [39] |
| Scinderin | ↑ | Q9Y6U3 | Human | VAT | Type 2 diabetes | Kim *et al.* 2014 [39] |
| Wiskott-Aldrich syndrome protein | ↑ | P42768 | Human | VAT | Type 2 diabetes | Kim *et al.* 2014 [39] |
| Tropomyosin beta chain | ↑ | P07951 | Human | SAT | Insulin resistance | Boden *et al*. 2008 [34] |
| Tropomyosin alpha 3 chain isoform 2 | ↑ | P21107-2 | Mouse | VAT and SAT | Insulin resistance | Ho *et al*. 2013 [41] |
| Tropomyosin alpha 4 chain | ↑ | P67936 | Human | SAT | Insulin resistance | Boden *et al*. 2008 [34] |
| Troponin I | ↑ | P13412 | Mouse | VAT and SAT | Insulin resistance | Ho *et al*. 2013 [41] |
| Tubulin alpha 4A chain | ↑ | P68368 | Mouse | VAT and SAT | Insulin resistance | Ho *et al*. 2013 [41] |
| Versican | ↑ | P13611 | Human | VAT | Type 2 diabetes | Kim *et al.* 2014 [39] |
| Vimentin | ↑ | P08670 | Human | SAT | Insulin resistance | Boden *et al*. 2008 [34] |
| WD repeat-containing protein 1 | ↑ | O88342 | Mouse | VAT and SAT | Insulin resistance | Ho *et al*. 2013 [41] |
|  |  |  |  |  |  |  |
| **5. Apoptosis / Cell cycle** |  |  |  |  |  |  |
| Baculoviral IAP repeat containing 6 | ↓ | Q9NR09 | Human | VAT | Type 2 diabetes | Kim *et al.* 2014 [39] |
| DnaJ homolog, subfamily C member 5 | ↓ | Q9H3Z4 | Human | VAT | Type 2 diabetes | Kim *et al.* 2014 [39] |
| Mitogen-activated protein kinase 14 | ↓ | Q16539 | Human | VAT | Type 2 diabetes | Kim *et al.* 2014 [39] |
| Nitrilase 1 | ↓ | Q86X76 | Human | VAT | Type 2 diabetes | Kim *et al.* 2014 [39] |
| Programmed cell death 6 interacting protein | ↓ | Q8WUM4 | Human | VAT | Type 2 diabetes | Kim *et al.* 2014 [39] |
| Protein phosphatase 6 catalytic subunit | ↓ | O00743 | Human | VAT | Type 2 diabetes | Kim *et al.* 2014 [39] |
| SH3 domain-containing kinase-binding protein 1 | ↓ | Q96B97 | Human | VAT | Type 2 diabetes | Kim *et al.* 2014 [39] |
| ADP-ribosylation factor 6 | ↑ | P62331 | Mouse | VAT and SAT | Insulin resistance | Ho *et al*. 2013 [41] |
| Heme oxygenase 1 | ↑ | P09601 | Human | VAT | Type 2 diabetes | Kim *et al.* 2014 [39] |
| Serine peptidase HTRA2 | ↑ | O43464 | Human | VAT | Type 2 diabetes | Kim *et al.* 2014 [39] |
| Lysosomal-associated membrane protein 1 | ↑ | P11279 | Human | VAT | Type 2 diabetes | Kim *et al.* 2014 [39] |
| Marginal zone B and B1 cell-specific protein | ↑ | Q8WU39 | Human | VAT | Type 2 diabetes | Kim *et al.* 2014 [39] |
| Ras-related GTP-binding protein A | ↑ | Q80X95 | Mouse | VAT and SAT | Insulin resistance | Ho *et al*. 2013 [41] |
| Sorting nexin 18 | ↑ | Q96RF0 | Human | VAT | Type 2 diabetes | Kim *et al.* 2014 [39] |
| WD repeat domain 82 | ↑ | Q6UXN9 | Human | VAT | Type 2 diabetes | Kim *et al.* 2014 [39] |
|  |  |  |  |  |  |  |
| **6. Calcium homeostasis** |  |  |  |  |  |  |
| Aspartly beta-hydroxylase | ↓ | Q9EQ66 | Mouse | VAT and SAT | Insulin resistance | Ho *et al*. 2013 [41] |
| Calreticulin | ↑ | P27797 | Human | SAT | Insulin resistance | Boden et al. 2008 [34] |
| Calsequestrin 1 | ↑ | Q925P6 | Mouse | VAT and SAT | Insulin resistance | Ho *et al*. 2013 [41] |
| Calumenin | ↓ | Q6IAW5 | Human | VAT | Type 2 diabetes | Kim *et al.* 2014 [39] |
| IQ motif containing GTPase activating protein 1 | ↓ | P46940 | Human | VAT | Type 2 diabetes | Kim *et al.* 2014 [39] |
| Grancalcin | ↑ | P28676 | Human | VAT | Type 2 diabetes | Kim *et al.* 2014 [39] |
| Sarcalumenin isoform 1 | ↑ | Q7TQ48-1 | Mouse | VAT and SAT | Insulin resistance | Ho *et al*. 2013 [41] |
| Ryanodine receptor 1 | ↑ | E9PZQ0 | Mouse | VAT and SAT | Insulin resistance | Ho *et al*. 2013 [41] |
| S100 calcium binding protein P | ↑ | P25815 | Human | VAT | Type 2 diabetes | Kim *et al.* 2014 [39] |
| Striatin | ↑ | O43815 | Human | VAT | Type 2 diabetes | Kim *et al.* 2014 [39] |
|  |  |  |  |  |  |  |
| **7. Transport** |  |  |  |  |  |  |
| Derlin 1 | ↓ | Q99J56 | Mouse | VAT and SAT | Insulin resistance | Ho *et al*. 2013 [41] |
| Family with sequence similarity 21A | ↓ | Q641Q2 | Human | VAT | Type 2 diabetes | Kim *et al.* 2014 [39] |
| Family with sequence similarity 21B | ↓ | Q5SNT6 | Human | VAT | Type 2 diabetes | Kim *et al.* 2014 [39] |
| GTPase-activating protein-binding protein 1 | ↓ | Q13283 | Human | VAT | Type 2 diabetes | Kim *et al.* 2014 [39] |
| Hemoglobin gamma A | ↓ | P69891 | Human | VAT | Type 2 diabetes | Kim *et al.* 2014 [39] |
| Hemoglobin alpha | ↓ | P01942 | Mouse | VAT and SAT | Insulin resistance | Ho *et al*. 2013 [41] |
| Mitochondrial dicarboxylate carrier | ↓ | Q9QZD8 | Mouse | VAT and SAT | Insulin resistance | Ho *et al*. 2013 [41] |
| Mitochondrial import inner membrane translocase subunit TIM16 | ↓ | Q9CQV1 | Mouse | VAT and SAT | Insulin resistance | Ho *et al*. 2013 [41] |
| Nucleoporin 98 kDa | ↓ | P52948 | Human | VAT | Type 2 diabetes | Kim *et al.* 2014 [39] |
| Nucleoporin NUP188 homolog | ↓ | Q6ZQH8 | Mouse | VAT and SAT | Insulin resistance | Ho *et al*. 2013 [41] |
| Selenium-binding protein 1 | ↓ | Q13228 | Human | VAT (omental) | Gestational diabetes | Oliva *et al.* 2013 [36] |
| Sideroflexin 1 | ↓ | Q99JR1 | Mouse | VAT and SAT | Insulin resistance | Ho *et al*. 2013 [41] |
| Solute carrier family 25 | ↓ | F6VVY4 | Mouse | VAT and SAT | Insulin resistance | Ho *et al*. 2013 [41] |
| Solute carrier family 25 member 12 | ↓ | O75746 | Human | VAT | Type 2 diabetes | Kim *et al.* 2014 [39] |
| Solute carrier family 25 member 10 | ↓ | Q9UBX3 | Human | VAT | Type 2 diabetes | Kim *et al.* 2014 [39] |
| Solute carrier family 9, subfamily A, member 3 regulator 2 | ↓ | Q9NRM0 | Human | VAT | Type 2 diabetes | Kim *et al.* 2014 [39] |
| Sorting nexin 1 | ↓ | Q13596 | Human | VAT | Type 2 diabetes | Kim *et al.* 2014 [39] |
| Vacuolar protein sorting 45 homolog | ↓ | Q9NRW7 | Human | VAT | Type 2 diabetes | Kim *et al.* 2014 [39] |
| Voltage-dependent anion channel 2 | ↓ | P45880 | Human | VAT | Type 2 diabetes | Kim *et al.* 2014 [39] |
| Adapter-related protein complex 1 subunit mu-1 | ↑ | Q9BXS5 | Human | VAT | Type 2 diabetes | Kim *et al.* 2014 [39] |
| Aquaporin 7 | ↑ | O54794 | Mouse | VAT and SAT | Insulin resistance | Ho *et al*. 2013 [41] |
| Exportin 1 | ↑ | O14980 | Human | VAT | Type 2 diabetes | Kim *et al.* 2014 [39] |
| Hemoglobin subunit beta | ↑ | P68871 | Human | VAT | Type 2 diabetes | Kim *et al.* 2014 [39] |
| Lectin, mannose-binding 2 | ↑ | Q12907 | Human | VAT | Type 2 diabetes | Kim *et al.* 2014 [39] |
| Major vault protein | ↑ | Q14764 | Human | VAT | Type 2 diabetes | Kim *et al.* 2014 [39] |
| Nucleoporin 37 kDa | ↑ | Q8NFH4 | Human | VAT | Type 2 diabetes | Kim *et al.* 2014 [39] |
| Oxysterol binding protein | ↑ | P22059 | Human | VAT | Type 2 diabetes | Kim *et al.* 2014 [39] |
| Oxysterol binding protein-like 9 | ↑ | Q96SU4 | Human | VAT | Type 2 diabetes | Kim *et al.* 2014 [39] |
| Rab GTPase-binding effector protein 1 | ↑ | Q15276 | Human | VAT | Type 2 diabetes | Kim *et al.* 2014 [39] |
| Ras-related protein Rab-18 | ↑ | Q9NP72 | Human | VAT | Type 2 diabetes | Kim *et al.* 2014 [39] |
| Reticulon 2 isoform 1 | ↑ | O70622-1 | Mouse | VAT and SAT | Insulin resistance | Ho *et al*. 2013 [41] |
| Solute carrier family 25 member 5 | ↑ | Q6KCM7 | Human | VAT | Type 2 diabetes | Kim *et al.* 2014 [39] |
| Solute carrier family 25 member 10 | ↑ | Q9UBX3 | Human | VAT | Type 2 diabetes | Kim *et al.* 2014 [39] |
| Sorbin and SH3 domain containing 1 | ↑ | Q9BX66 | Human | VAT | Type 2 diabetes | Kim *et al.* 2014 [39] |
| Syntaxin 4 | ↑ | Q12846 | Human | VAT | Type 2 diabetes | Kim *et al.* 2014 [39] |
| Trimeric intracellular cation channel type A | ↑ | Q3TMP8 | Mouse | VAT and SAT | Insulin resistance | Ho *et al*. 2013 [41] |
| Vesicle-associated membrane protein 2 | ↑ | P63027 | Human | VAT | Type 2 diabetes | Kim *et al.* 2014 [39] |
|  |  |  |  |  |  |  |
| **8. Nucleic acid metabolism** |  |  |  |  |  |  |
| Damage-specific DNA binding protein 1 | ↓ | Q16531 | Human | VAT | Type 2 diabetes | Kim *et al.* 2014 [39] |
| Four and a half LIM domains protein 2 | ↓ | Q14192 | Human | VAT | Type 2 diabetes | Kim *et al.* 2014 [39] |
| Heterogeneous nuclear ribonucleoprotein A3 isoform 1 | ↓ | Q8BG05-1 | Mouse | VAT and SAT | Insulin resistance | Ho *et al*. 2013 [41] |
| Histidine triad nucleotide binding protein 1 | ↓ | P49773 | Human | VAT | Type 2 diabetes | Kim *et al.* 2014 [39] |
| Leucine-rich pentatricopeptide repeat containing | ↓ | P42704 | Human | VAT | Type 2 diabetes | Kim *et al.* 2014 [39] |
| Leucine-rich repeat-containing protein 47 | ↓ | Q8N1G4 | Human | VAT | Type 2 diabetes | Kim *et al.* 2014 [39] |
| Mediator complex subunit 1 | ↓ | Q15648 | Human | VAT | Type 2 diabetes | Kim *et al.* 2014 [39] |
| NIF3 NGG1 interacting factor 3-like 1 | ↓ | Q9GZT8 | Human | VAT | Type 2 diabetes | Kim *et al.* 2014 [39] |
| PCF11, cleavage and polyadenylation factor subunit | ↓ | O94913 | Human | VAT | Type 2 diabetes | Kim *et al.* 2014 [39] |
| Polypyrimidine tract binding protein 1 | ↓ | P26599 | Human | VAT | Type 2 diabetes | Kim *et al.* 2014 [39] |
| Serine/threonine kinase receptor associated protein | ↓ | Q9Y3F4 | Human | VAT | Type 2 diabetes | Kim *et al.* 2014 [39] |
| Translin | ↓ | Q15631 | Human | VAT | Type 2 diabetes | Kim *et al.* 2014 [39] |
| tRNA pseudouridylate synthase 3 | ↓ | Q9BZE2 | Human | VAT | Type 2 diabetes | Kim *et al.* 2014 [39] |
| UDP-N-acteylglucosamine pyrophosphorylase 1-like 1 | ↓ | Q3KQV9 | Human | VAT | Type 2 diabetes | Kim *et al.* 2014 [39] |
| Valosin containing protein | ↓ | P55072 | Human | VAT | Type 2 diabetes | Kim *et al.* 2014 [39] |
| 5'-3' exoribonuclease 2 | ↑ | Q9H0D6 | Human | VAT | Type 2 diabetes | Kim *et al.* 2014 [39] |
| Brain abundant, membrane attached signal protein 1 | ↑ | P80723 | Human | VAT | Type 2 diabetes | Kim *et al.* 2014 [39] |
| Eukaryotic translation initiation factor 4A3 | ↑ | P38919 | Human | VAT | Type 2 diabetes | Kim *et al.* 2014 [39] |
| Exosome component 8 | ↑ | Q96B26 | Human | VAT | Type 2 diabetes | Kim *et al.* 2014 [39] |
| Heterogeneous nuclear ribonucleoprotein L | ↑ | P14866 | Human | VAT | Type 2 diabetes | Kim *et al.* 2014 [39] |
| NHP2 non-histone chromosome protein 2-like 1 | ↑ | Q6FHM6 | Human | VAT | Type 2 diabetes | Kim *et al.* 2014 [39] |
| PRP8 pre-mRNA processing factor 8 homolog | ↑ | Q6P2Q9 | Human | VAT | Type 2 diabetes | Kim *et al.* 2014 [39] |
| RNA binding motif protein, X-linked | ↑ | P38159 | Human | VAT | Type 2 diabetes | Kim *et al.* 2014 [39] |
| Serine/arginine-rich splicing factor 3 | ↑ | P84103 | Human | VAT | Type 2 diabetes | Kim *et al.* 2014 [39] |
| Serine/arginine-rich splicing factor 7 | ↑ | Q16629 | Human | VAT | Type 2 diabetes | Kim *et al.* 2014 [39] |
| SET nuclear oncogene | ↑ | Q01105 | Human | VAT | Type 2 diabetes | Kim *et al.* 2014 [39] |
| Signal transducer and activator of transcription 5B | ↑ | P51692 | Human | VAT | Type 2 diabetes | Kim *et al.* 2014 [39] |
| TAR DNA binding protein | ↑ | Q13148 | Human | VAT | Type 2 diabetes | Kim *et al.* 2014 [39] |
| Thyroid hormone receptor interactor 6 | ↑ | Q15654 | Human | VAT | Type 2 diabetes | Kim *et al.* 2014 [39] |
| Transcription elongation factor A (SII), 1 | ↑ | P23193 | Human | VAT | Type 2 diabetes | Kim *et al.* 2014 [39] |
| UPF1 regulator of nonsense transcripts | ↑ | Q92900 | Human | VAT | Type 2 diabetes | Kim *et al.* 2014 [39] |
|  |  |  |  |  |  |  |
| **9. Protein synthesis / Translation** |  |  |  |  |  |  |
| Elongation factor Tu | ↓ | P49411 | Human | VAT | Type 2 diabetes | Kim *et al.* 2014 [39] |
| Elongation factor Tu GTP-binding domain-containing protein 2 | ↓ | Q15029 | Human | VAT | Type 2 diabetes | Kim *et al.* 2014 [39] |
| Eukaryotic translation initiation factor 4A1 | ↓ | P60842 | Human | VAT | Type 2 diabetes | Kim *et al.* 2014 [39] |
| Ribosomal protein L11 | ↓ | P62913 | Human | VAT | Type 2 diabetes | Kim *et al.* 2014 [39] |
| Ribosomal protein L6 | ↓ | Q02878 | Human | VAT | Type 2 diabetes | Kim *et al.* 2014 [39] |
| Ribosomal protein L7a | ↓ | P62424 | Human | VAT | Type 2 diabetes | Kim *et al.* 2014 [39] |
| Ribosomal protein S11 | ↓ | P62280 | Human | VAT | Type 2 diabetes | Kim *et al.* 2014 [39] |
| Elongation factor Tu isoform 1 | ↑ | D3YVN7-1 | Mouse | VAT and SAT | Insulin resistance | Ho *et al*. 2013 [41] |
| Eukaryotic translation initiation factor 4 gamma 1 | ↑ | Q04637 | Human | VAT | Type 2 diabetes | Kim *et al.* 2014 [39] |
| Glutaminyl-tRNA synthetase | ↑ | P47897 | Human | VAT | Type 2 diabetes | Kim *et al.* 2014 [39] |
| Methionyl-tRNA synthetase | ↑ | P56192 | Human | VAT | Type 2 diabetes | Kim *et al.* 2014 [39] |
| Mitochondrial ribosomal protein S17 | ↑ | Q9Y2R5 | Human | VAT | Type 2 diabetes | Kim *et al.* 2014 [39] |
| Ribonuclease 2 | ↑ | P10153 | Human | VAT | Type 2 diabetes | Kim *et al.* 2014 [39] |
| Ribonuclease 3 | ↑ | P12724 | Human | VAT | Type 2 diabetes | Kim *et al.* 2014 [39] |
| Ribosomal protein L8 | ↑ | P62917 | Human | VAT | Type 2 diabetes | Kim *et al.* 2014 [39] |
| Ribosomal protein L9 | ↑ | P32969 | Human | VAT | Type 2 diabetes | Kim *et al.* 2014 [39] |
| Ribosomal protein L10 | ↑ | P27635 | Human | VAT | Type 2 diabetes | Kim *et al.* 2014 [39] |
| Ribosomal protein L10a | ↑ | P62906 | Human | VAT | Type 2 diabetes | Kim *et al.* 2014 [39] |
| Ribosomal protein L13 | ↑ | P26373 | Human | VAT | Type 2 diabetes | Kim *et al.* 2014 [39] |
| Ribosomal protein S26 | ↑ | P62854 | Human | VAT | Type 2 diabetes | Kim *et al.* 2014 [39] |
| Ribosomal protein S30 | ↑ | P62862 | Mouse | VAT and SAT | Insulin resistance | Ho *et al*. 2013 [41] |
| Small nuclear ribonucleoprotein D1 polypeptide 16 kDa | ↑ | P62314 | Human | VAT | Type 2 diabetes | Kim *et al.* 2014 [39] |
| Small nuclear ribonucleoprotein polypeptide F | ↑ | P62306 | Human | VAT | Type 2 diabetes | Kim *et al.* 2014 [39] |
|  |  |  |  |  |  |  |
| **10. Protein signaling** |  |  |  |  |  |  |
| G protein-coupled receptor kinase 4 | ↓ | P32298 | Human | VAT | Type 2 diabetes | Kim *et al.* 2014 [39] |
| 14-3-3 protein gamma | ↑ | P61981 | Human | SAT | Insulin resistance | Boden *et al*. 2008 [34] |
| Guanine nucleotide-binding protein alpha 11 | ↑ | P29992 | Human | VAT | Type 2 diabetes | Kim *et al.* 2014 [39] |
| Guanine nucleotide-binding protein alpha 13 | ↑ | Q14344 | Human | VAT | Type 2 diabetes | Kim *et al.* 2014 [39] |
| Guanine nucleotide-binding protein G(o) subunit alpha isoform 2 | ↑ | P18872-2 | Mouse | VAT and SAT | Insulin resistance | Ho *et al*. 2013 [41] |
| Protein tyrosine phosphatase, non-receptor type 6 | ↑ | P29350 | Human | VAT | Type 2 diabetes | Kim *et al.* 2014 [39] |
| Ras homolog family member G | ↑ | P84095 | Human | VAT | Type 2 diabetes | Kim *et al.* 2014 [39] |
| Ras-related protein Rap-2b | ↑ | P61225 | Human | VAT | Type 2 diabetes | Kim *et al.* 2014 [39] |
| Rho GDP-dissociation inhibitor 1 | ↑ | P52565 | Human | SAT | Insulin resistance | Boden *et al*. 2008 [34] |
| Rho GDP-dissociation inhibitor 2 | ↑ | P52566 | Human | VAT | Type 2 diabetes | Kim *et al.* 2014 [39] |
|  |  |  |  |  |  |  |
| **11. Protein folding** |  |  |  |  |  |  |
| Hsc70-interacting protein | ↓ | Q99L47 | Mouse | VAT and SAT | Insulin resistance | Ho *et al*. 2013 [41] |
| Glucose-regulated protein 75 kDa | ↓ | P38647 | Mouse | BAT | Insulin resistance | Schmid *et al.* 2004 [37] |
| T-complex protein 1 subunit gamma | ↓ | P49368 | Human | VAT | Type 2 diabetes | Kim *et al.* 2014 [39] |
| ERO1-like protein alpha | ↑ | Q96HE7 | Human | VAT | Type 2 diabetes | Kim *et al.* 2014 [39] |
| Peptidylprolyl isomerase A-like 4G | ↑ | A2BFH1 | Human | VAT | Type 2 diabetes | Kim *et al.* 2014 [39] |
| T-complex protein 1 subunit gamma | ↑ | P80318‎ | Mouse | VAT and SAT | Insulin resistance | Ho *et al*. 2013 [41] |
|  |  |  |  |  |  |  |
| **12. DNA-binding** |  |  |  |  |  |  |
| Histone H2A | ↓ | Q8CGP4 | Mouse | VAT and SAT | Insulin resistance | Ho *et al*. 2013 [41] |
| Histone H2AJ | ↓ | Q8R1M2 | Mouse | VAT and SAT | Insulin resistance | Ho *et al*. 2013 [41] |
| Histone H3.2 | ↓ | P84228 | Mouse | VAT and SAT | Insulin resistance | Ho *et al*. 2013 [41] |
| Histone H2A type 1-A | ↑ | Q96QV6 | Human | VAT | Type 2 diabetes | Kim *et al.* 2014 [39] |
| Histone H2AX | ↑ | P16104 | Human | VAT | Type 2 diabetes | Kim *et al.* 2014 [39] |
| Histone H2AY | ↑ | O75367 | Human | VAT | Type 2 diabetes | Kim *et al.* 2014 [39] |
| Histone H1.2 | ↑ | P15864 | Mouse | VAT and SAT | Insulin resistance | Ho *et al*. 2013 [41] |
| Histone H1.4 | ↑ | P43274 | Mouse | VAT and SAT | Insulin resistance | Ho *et al*. 2013 [41] |
| High mobility group protein B2 | ↑ | P26583 | Human | VAT | Type 2 diabetes | Kim *et al.* 2014 [39] |
| Thymopoietin | ↑ | P42166 | Human | VAT | Type 2 diabetes | Kim *et al.* 2014 [39] |
|  |  |  |  |  |  |  |
| **13. Coagulation** |  |  |  |  |  |  |
| Fibrinogen gamma chain | ↓ | P02679 | Human | VAT | Type 2 diabetes | Kim *et al.* 2014 [39] |
| Protein C (inactivator of coagulation factors Va and VIIIa) | ↓ | P04070 | Human | VAT | Type 2 diabetes | Kim *et al.* 2014 [39] |
| Antithrombin III | ↑ | P01008 | Human | VAT | Type 2 diabetes | Murri *et al.* 2013 [35] |
| Fibrinogen beta chain | ↑ | P02675 | Human | VAT (omental) | Gestational diabetes | Oliva *et al.* 2013 [36] |
| Glycoprotein IX | ↑ | P14770 | Human | VAT | Type 2 diabetes | Kim *et al.* 2014 [39] |
|  |  |  |  |  |  |  |
| **14. Other function** |  |  |  |  |  |  |
| 3-hydroxybutyrate dehydrogenase type 1 | ↓ | Q02338 | Human | VAT | Type 2 diabetes | Kim *et al.* 2014 [39] |
| Acylphosphatase 2 | ↓ | P14621 | Human | VAT | Type 2 diabetes | Kim *et al.* 2014 [39] |
| Adenylosuccinate synthase isozyme 1 | ↓ | Q8N142 | Human | VAT | Type 2 diabetes | Kim *et al.* 2014 [39] |
| Alpha-2-antiplasmin | ↓ | Q5ND35 | Mouse | VAT and SAT | Insulin resistance | Ho *et al*. 2013 [41] |
| Aldo-keto reductase family 1 member C1 | ↓ | Q04828 | Human | VAT | Type 2 diabetes | Kim *et al.* 2014 [39] |
| Atrial natriuretic peptide receptor A | ↓ | P16066 | Human | VAT | Type 2 diabetes | Kim *et al.* 2014 [39] |
| Chromosome 10 open reading frame 116 | ↓ | Q9BW04 | Human | VAT | Type 2 diabetes | Kim *et al.* 2014 [39] |
| Coiled-coil domain containing 62 | ↓ | Q6P9F0 | Human | VAT | Type 2 diabetes | Kim *et al.* 2014 [39] |
| Cystatin B (Stefin B) | ↓ | Q76LA1 | Human | VAT | Type 2 diabetes | Kim *et al.* 2014 [39] |
| Dystrobrevin alpha | ↓ | Q9Y4J8 | Human | VAT | Type 2 diabetes | Kim *et al.* 2014 [39] |
| Dystroglycan 1 | ↓ | Q14118 | Human | VAT | Type 2 diabetes | Kim *et al.* 2014 [39] |
| Enoyl CoA hydratase domain-containing protein 1 | ↓ | Q9NTX5 | Human | VAT | Type 2 diabetes | Kim *et al.* 2014 [39] |
| Haloacid dehalogenase-like hydrolase domain-containing 3 | ↓ | Q9BSH5 | Human | VAT | Type 2 diabetes | Kim *et al.* 2014 [39] |
| Mitochondrial amidoxime reducing component 1 | ↓ | Q5VT66 | Human | VAT | Type 2 diabetes | Kim *et al.* 2014 [39] |
| Myoferlin | ↓ | Q9NZM1 | Human | VAT | Type 2 diabetes | Kim *et al.* 2014 [39] |
| Semaphorin 5A | ↓ | Q13591 | Human | VAT | Type 2 diabetes | Kim *et al.* 2014 [39] |
| SMYD family member 5 | ↓ | Q6GMV2 | Human | VAT | Type 2 diabetes | Kim *et al.* 2014 [39] |
| Testis-specific serine kinase 1B | ↓ | Q9BXA7 | Human | VAT | Type 2 diabetes | Kim *et al.* 2014 [39] |
| Torsin A interacting protein 2 | ↓ | Q8NFQ8 | Human | VAT | Type 2 diabetes | Kim *et al.* 2014 [39] |
| Transmembrane protein 14C | ↓ | Q9CQN6 | Mouse | VAT and SAT | Insulin resistance | Ho *et al*. 2013 [41] |
| Transmembrane protein 43 | ↓ | Q9BTV4 | Human | VAT | Type 2 diabetes | Kim *et al.* 2014 [39] |
| Tumor suppressor candidate 5 | ↓ | Q8IXB3 | Human | VAT | Type 2 diabetes | Kim *et al.* 2014 [39] |
| Uroporphyrinogen decarboxylase | ↓ | P06132 | Human | VAT | Type 2 diabetes | Kim *et al.* 2014 [39] |
| Usher syndrome 2A protein | ↓ | O75445 | Human | VAT | Type 2 diabetes | Kim *et al.* 2014 [39] |
| Zinc finger protein 428 | ↓ | Q96B54 | Human | VAT | Type 2 diabetes | Kim *et al.* 2014 [39] |
| Abhydrolase domain-containing protein 1 | ↑ | Q9QZC8 | Mouse | VAT and SAT | Insulin resistance | Ho *et al*. 2013 [41] |
| Alpha-1-B glycoprotein | ↑ | P04217 | Human | VAT | Type 2 diabetes | Kim *et al.* 2014 [39] |
| Alpha-2-HS-glycoprotein | ↑ | P02765 | Human | VAT | Type 2 diabetes | Kim *et al.* 2014 [39] |
| Caveolin 2 | ↑ | Q9WVC3 | Mouse | VAT and SAT | Insulin resistance | Ho *et al*. 2013 [41] |
| Complement component 4 binding protein alpha | ↑ | Q5VVQ8 | Human | VAT | Type 2 diabetes | Kim *et al.* 2014 [39] |
| Cortactin binding protein 2 | ↑ | Q20BG9 | Human | VAT | Type 2 diabetes | Kim *et al.* 2014 [39] |
| Cytosolic iron-sulfur protein assembly 1 | ↑ | O76071 | Human | VAT | Type 2 diabetes | Kim *et al.* 2014 [39] |
| Dopamine beta-hydroxylase | ↑ | P09172 | Human | VAT | Type 2 diabetes | Kim *et al.* 2014 [39] |
| Endosialin | ↑ | Q9HCU0 | Human | VAT | Type 2 diabetes | Kim *et al.* 2014 [39] |
| ES1 protein homolog | ↑ | Q9D172 | Mouse | VAT and SAT | Insulin resistance | Ho *et al*. 2013 [41] |
| FCH domain only 2 | ↑ | Q0JRZ9 | Human | VAT | Type 2 diabetes | Kim *et al.* 2014 [39] |
| Follistatin-like 1 | ↑ | Q12841 | Human | VAT | Type 2 diabetes | Kim *et al.* 2014 [39] |
| Gamma-synuclein | ↑ | O76070 | Human | SAT | Insulin resistance | Boden *et al*. 2008 [34] |
| Gamma-synuclein | ↑ | Q9Z0F7 | Mouse | VAT and SAT | Insulin resistance | Ho *et al*. 2013 [41] |
| Hemicentin 1 | ↑ | Q96RW7 | Human | VAT | Type 2 diabetes | Kim *et al.* 2014 [39] |
| Lamin B receptor | ↑ | Q14739 | Human | VAT | Type 2 diabetes | Kim *et al.* 2014 [39] |
| Leucine-rich alpha-2-glycoprotein 1 | ↑ | P02750 | Human | VAT | Type 2 diabetes | Kim *et al.* 2014 [39] |
| NSFL1 cofactor p47 | ↑ | Q9UNZ2 | Human | VAT | Type 2 diabetes | Kim *et al.* 2014 [39] |
| Osteoclast stimulating factor 1 | ↑ | Q92882 | Human | VAT | Type 2 diabetes | Kim *et al.* 2014 [39] |
| Phosphatidylinositol binding clathrin assembly protein | ↑ | Q13492 | Human | VAT | Type 2 diabetes | Kim *et al.* 2014 [39] |
| Phosphopantothenoylcysteine decarboxylase | ↑ | Q96CD2 | Human | VAT | Type 2 diabetes | Kim *et al.* 2014 [39] |
| Procollagen C-endopeptidase enhancer | ↑ | Q15113 | Human | VAT | Type 2 diabetes | Kim *et al.* 2014 [39] |
| Proline synthetase co-transcribed homolog | ↑ | O94903 | Human | VAT | Type 2 diabetes | Kim *et al.* 2014 [39] |
| Protein phosphatase 1 regulatory subunit 12C | ↑ | Q9BZL4 | Human | VAT | Type 2 diabetes | Kim *et al.* 2014 [39] |
| S100-A10 | ↑ | P08207 | Mouse | VAT and SAT | Insulin resistance | Ho *et al*. 2013 [41] |
| Synaptotagmin binding cytoplasmic RNA interacting protein | ↑ | Q05CK9 | Human | VAT | Type 2 diabetes | Kim *et al.* 2014 [39] |
| Testis derived transcript (3 LIM domains) | ↑ | A4D0U5 | Human | VAT | Type 2 diabetes | Kim *et al.* 2014 [39] |
| Titin | ↑ | Q8WZ42 | Human | VAT | Type 2 diabetes | Kim *et al.* 2014 [39] |
| Tumor protein D52-like 2 | ↑ | O43399 | Human | VAT | Type 2 diabetes | Kim *et al.* 2014 [39] |
|  |  |  |  |  |  |  |
| **15. Unknown** |  |  |  |  |  |  |
| Intelectin 2 | ↓ | Q8WWU7 | Human | VAT | Type 2 diabetes | Kim *et al.* 2014 [39] |
| Putative uncharacterized protein | ↓ | - | Mouse | VAT and SAT | Insulin resistance | Ho *et al*. 2013 [41] |
| Putative uncharacterized protein | ↓ | - | Mouse | VAT and SAT | Insulin resistance | Ho *et al*. 2013 [41] |
| Putative uncharacterized protein | ↓ | - | Mouse | VAT and SAT | Insulin resistance | Ho *et al*. 2013 [41] |
| Stromal cell-derived factor 2-like 1 | ↓ | Q9HCN8 | Human | VAT | Type 2 diabetes | Kim *et al.* 2014 [39] |
| Thiosulfate sulfurtransferase /rhodanese-like domain containing 1 | ↓ | Q8NFU3 | Human | VAT | Type 2 diabetes | Kim *et al.* 2014 [39] |
| Transmembrane and coiled-coil domain containing protein 1 | ↓ | Q921L3 | Mouse | VAT and SAT | Insulin resistance | Ho *et al*. 2013 [41] |
| Transmembrane protein 205 | ↓ | Q6UW68 | Human | VAT | Type 2 diabetes | Kim *et al.* 2014 [39] |
| Ubinuclein 2 | ↓ | Q6ZU65 | Human | VAT | Type 2 diabetes | Kim *et al.* 2014 [39] |
| WD repeat domain 52 | ↓ | Q96MT7 | Human | VAT | Type 2 diabetes | Kim *et al.* 2014 [39] |
| Chromosome 1 open reading frame 27 | ↑ | Q5SWX8 | Human | VAT | Type 2 diabetes | Kim *et al.* 2014 [39] |
| CORO7-PAM16 readthrough | ↑ | I3L167 | Human | VAT | Type 2 diabetes | Kim *et al.* 2014 [39] |
| PITH domain containing 1 | ↑ | Q9GZP4 | Human | VAT | Type 2 diabetes | Kim *et al.* 2014 [39] |
| V-rel reticuloendotheliosis viral oncogene homolog A (avian) | ↑ | Q04206 | Human | VAT | Type 2 diabetes | Kim *et al.* 2014 [39] |
|  |  |  |  |  |  |  |

↑ indicates an increase of the protein abundance in carbohydrate disorder status; ↓ indicates a decrease of the protein abundance in carbohydrate disorder status; BAT, brown adipose tissue; SAT, subcutaneous adipose tissue; VAT, visceral adipose tissue; WAT, white adipose tissue. The biological functions were identified by Uniprot and QuickGO.
